# Global Pyrogeography: the Current and Future Distribution of Wildfire

Meg A. Krawchuk<sup>1</sup>, Max A. Moritz<sup>1\*</sup>, Marc-André Parisien<sup>1,2</sup>, Jeff Van Dorn<sup>3</sup>, Katharine Hayhoe<sup>3,4</sup>

**1** Department of Environmental Science, Policy and Management, University of California, Berkeley, California, United States of America, **2** Natural Resources Canada, Canadian Forest Service, Edmonton, Alberta, Canada, **3** ATMOS Research and Consulting, Lubbock, Texas, United States of America, **4** Department of Geosciences, Texas Tech University, Lubbock, Texas, United States of America

## Abstract

Climate change is expected to alter the geographic distribution of wildfire, a complex abiotic process that responds to a variety of spatial and environmental gradients. How future climate change may alter global wildfire activity, however, is still largely unknown. As a first step to quantifying potential change in global wildfire, we present a multivariate quantification of environmental drivers for the observed, current distribution of vegetation fires using statistical models of the relationship between fire activity and resources to burn, climate conditions, human influence, and lightning flash rates at a coarse spatiotemporal resolution (100 km, over one decade). We then demonstrate how these statistical models can be used to project future changes in global fire patterns, highlighting regional hotspots of change in fire probabilities under future climate conditions as simulated by a global climate model. Based on current conditions, our results illustrate how the availability of resources to burn and climate conditions conducive to combustion jointly determine why some parts of the world are fire-prone and others are fire-free. In contrast to any expectation that global warming should necessarily result in more fire, we find that regional increases in fire probabilities may be counter-balanced by decreases at other locations, due to the interplay of temperature and precipitation variables. Despite this net balance, our models predict substantial invasion and retreat of fire across large portions of the globe. These changes could have important effects on terrestrial ecosystems since alteration in fire activity may occur quite rapidly, generating ever more complex environmental challenges for species dispersing and adjusting to new climate conditions. Our findings highlight the potential for widespread impacts of climate change on wildfire, suggesting severely altered fire regimes and the need for more explicit inclusion of fire in research on global vegetation-climate change dynamics and conservation planning.

**Citation:** Krawchuk MA, Moritz MA, Parisien M-A, Van Dorn J, Hayhoe K (2009) Global Pyrogeography: the Current and Future Distribution of Wildfire. *PLoS ONE* 4(4): e5102. doi:10.1371/journal.pone.0005102

**Editor:** Jerome Chave, Centre National de la Recherche Scientifique, France

**Received:** December 10, 2008; **Accepted:** February 25, 2009; **Published:** April 8, 2009

**Copyright:** © 2009 Krawchuk et al. This is an open-access article distributed under the terms of the Creative Commons Attribution License, which permits unrestricted use, distribution, and reproduction in any medium, provided the original author and source are credited.

**Funding:** Funding provided by The Nature Conservancy's Global Fire Initiative and Natural Sciences and Engineering Research Council of Canada. The funders had no role in study design, data collection and analysis, decision to publish, or preparation of the manuscript.

**Competing Interests:** The authors have declared that no competing interests exist.

\* E-mail: mmoritz@nature.berkeley.edu

## Introduction

Wildfire is an ecological disturbance process that has a heterogeneous global distribution controlled by the coincidence of three basic requirements: vegetative resources to burn, environmental conditions that promote combustion, and ignitions. While the physical process of combustion is theoretically simple, understanding the relative influence of biotic and abiotic controls on observed, modern fire regimes is an ongoing focus in ecological research, nuanced by the role of humans who are changing landscapes to be more or less flammable, as well as lighting and extinguishing fires [1–3]. Interest in fire research has become global and interdisciplinary due to influences, interactions, and feedbacks among fire, terrestrial, and atmospheric systems in the context of human health [4], climate dynamics [5], and policy adaptation [6].

Recent work has begun to synthesize common trends in environmental influence on fire across broadly different locations [7,8], but our comprehension of overarching biophysical controls on global fire activity is still limited. The collection of fire data by remote sensing provides an archive from which to examine global patterns of wildfire, such as differences between areas of the planet

where fire occurs and those where it does not. The first cohort of global fire studies focused on validation and translation of remotely sensed fire products to area burned [9,10], global carbon emissions from fire [5], and how seasonal variation in fire relates to ocean-atmosphere cycles [11–13]. An initial characterization of the global fire environment by Dwyer et al. [14] consisted of a short-term assessment of 21 months of data to evaluate simple relationships between fire activity and climate variables, as well as fire and vegetation type. The refinement of global fire databases and accumulation of longer-term records has further enabled such statistically-based analyses of empirical data, including relationships of global fire activity to anthropogenic explanatory variables [2] and circum-tropical fires to moisture and energy metrics [8]. However, a thorough multivariate statistical assessment that captures the complexity of broad global fire-environment relationships has yet to be undertaken. Furthermore, once macro-scale fire-environment relationships have been established, the information provided by statistical parameter estimates can be used to consider crucial questions about how climate change may alter the distribution of fire across the globe.

As an alternative to statistical models, simulations using dynamic global vegetation models (DGVMs) have been used as

a complementary method to study the global distribution and effect of fire [15–18]. Although novel ideas about the role of fire in shaping global vegetation patterns [19] and how fire frequency might change in the future [15] have been explored with DGVMs, the simplified approach to simulating fire in many DGVMs has, as yet, limited their utility in understanding current patterns of fire around the world. As such, current DGVMs are not capable of explicitly simulating the extent to which future climate change may alter fire dynamics [20,21], though refinements to DGVM fire modules and simulation experiments are promising.

The concept of global pyrogeography — the study of the spatial distribution of fire across the planet — borrows heavily from ecology, where three general factors are used to explain the distribution and abundance of organisms: resource availability, physiologically appropriate environmental conditions, and dispersal ability [22]. In the context of fire, flammable vegetation is the consumable resource, fire-conducive weather patterns and their long-term representation (i.e., climate) form the environmental conditions axis, and ignitions are analogous to dispersal [23]. Admittedly, these dominant constraints on the distribution of fire are intertwined and complex. Climate is a superordinate control over both the resources and conditions for fire [7], because it has a direct, short-term effect on fire weather conditions and an indirect, longer-term effect in determining the distribution and quantity of flammable vegetation to burn. In turn, weather and vegetation conditions affect ignitions, in conjunction with topographic effects on patterns of lightning strikes [24] and anthropogenic control over ignition.

Global studies examining how the distribution of fire might change in the future are necessary to establish the potential impacts of climate change on vegetation and ecosystems. Local and regional studies have projected both increases and decreases in future fire activity, [25–27] however we lack the quantitative estimates needed to understand what the net effect might be across a warmer planet. For these reasons, our first goal in this global pyrogeography was to characterize the observed global fire occurrence pattern (Figure 1) with an ensemble of multivariate statistical generalized additive models (GAMs) combining existing fire occurrence, climate, net primary productivity (NPP), and ignition data. Since many parts of the globe are fire-free because they have little or no vegetation to burn, it is informative to distinguish between areas that do not burn due to limiting consumable resources versus limiting environmental conditions. To address this issue, we included global vegetation distribution as an explicit metric for resource availability in one ensemble of models ( $\text{FIRE}_{\text{NPP}}$ ), allowing climate to describe additional variability in fire-conducive conditions. We contrasted this approach to another ensemble of models ( $\text{FIRE}_{\text{noNPP}}$ ) where climate variables alone were used to describe both resources and conditions needed for fire. Our results provide a novel multivariate framework to describe where we currently see wildfire across the planet. We then apply these models to future climate scenarios, providing a first estimate of potential changes in the global distribution of fire. The climate change projections presented here are based on simulations from the Geophysical Fluid Dynamics Laboratory Climate Model 2.1 (GFDL CM2.1). Our intent is to demonstrate the scope of changes that could occur given anticipated climates under mid-high (A2), and lower (B1) emissions scenarios proposed by the IPCC Special Report on Emission Scenarios [28].

## Materials and Methods

### Data

**Overview.** We constructed statistical GAMs for two regression model scenarios to characterize current fire patterns,

$\text{FIRE}_{\text{NPP}}$  (explicitly including biomass to burn) and  $\text{FIRE}_{\text{noNPP}}$  (allowing climate to explain both biomass and environmental conditions), based on ten random sub-samples of fire [29], climate [30,31], NPP [32], and ignition [33,34] data. We refer to these models as each forming a ‘sub-model ensemble’. The ensemble GAMs were then used with simulated future climate data to project the potential distribution of fire in the 21<sup>st</sup> century. We used global data at a spatial resolution of 100-km (10 000 km<sup>2</sup>) on a Behrmann Cylindrical Equal Area projection, resulting in 12 098 pixels over the terrestrial extent of the planet. The Antarctic continent and small islands were excluded as were some coastal regions, because of an *a priori* cutoff rule of at least 1/3 land fraction in the gridded 2-degree climate data.

**Fire.** Mapped global vegetation fire locations came from the European Space Agency’s Advanced and Along Track Scanning Radiometer (ATSR) World Fire Atlas (algorithm 2) for 1996 to 2006 [29]. The ATSR fire data were registered to our study domain, where pixels containing at least one fire over the decade of record were categorized as ‘fire-prone’ and those that did not as ‘fire-free’ (Figure 1A and 1B); alternative classifications will be explored in future work. Using this criterion, we identified 8399 (69%) pixels as fire-prone over the 10-year period. The ATSR satellite data include both human- and lightning-caused fires, which are currently indistinguishable.

There are numerous satellite sensors that can be used to record wildfire data, and these have been shown to vary somewhat in their estimates of activity and distribution of fire [35]. We selected the ATSR data because it provides the longest temporal data set (10 years) of all fine-resolution global fire products, and post-processing by Mota et al. [29] provided detailed screening of non-vegetation fires. Mota et al. [29] used volcanic activity, night-light, and land cover data as screening tools to remove non-vegetation fires from this ATSR database alongside statistical techniques that detected anomalous data clusters. The ATSR senses active night-time fires at a three day interval to a minimum burning area of 0.01 to 0.1 ha. Night-time acquisition minimizes false positives due to sun-glint, reflection, and bright soil surfaces, but it potentially misses short-duration daytime events and summer fires at high latitudes [10]. For example, Kasischke et al. [10] demonstrated that many fires may go undetected by the ATSR in the boreal forest.

The macro-scaled resolution of our study is one way to address limitations of the fire data, namely omission errors due to detection difficulties, and a relatively short temporal extent. We tested the assumption that ATSR fire data were representative of other global fire products and not biased due to detection difficulties by comparing the distribution of ATSR fire data to those produced by the newly available MODIS Collection 5 active fire data [36], and found the distribution to be very similar (Text S1, Figure S1). We also tested whether the decade of ATSR fire data were representative and spatially similar to long-term fire patterns by comparing ATSR data to a map of large forest fires recorded in Canada between 1959 to 2002 [37] (Text S2, Figure S2). We found a strong accord between our macro-scaled ATSR product and the Canadian fire database, even in the northern boreal forests where detection of fire can be compromised in finer-scaled studies [10].

**Climate.** Our statistical GAMs were built from 17 climate variables (Table 1) representing potential environmental conditions controlling fire. These so-called ‘bioclimatic variables’ were calculated climate averages of temperature and precipitation [30], providing biologically meaningful approximations of recent historical energy and water balances, as well as environmental extremes. We used variables calculated for climate data from

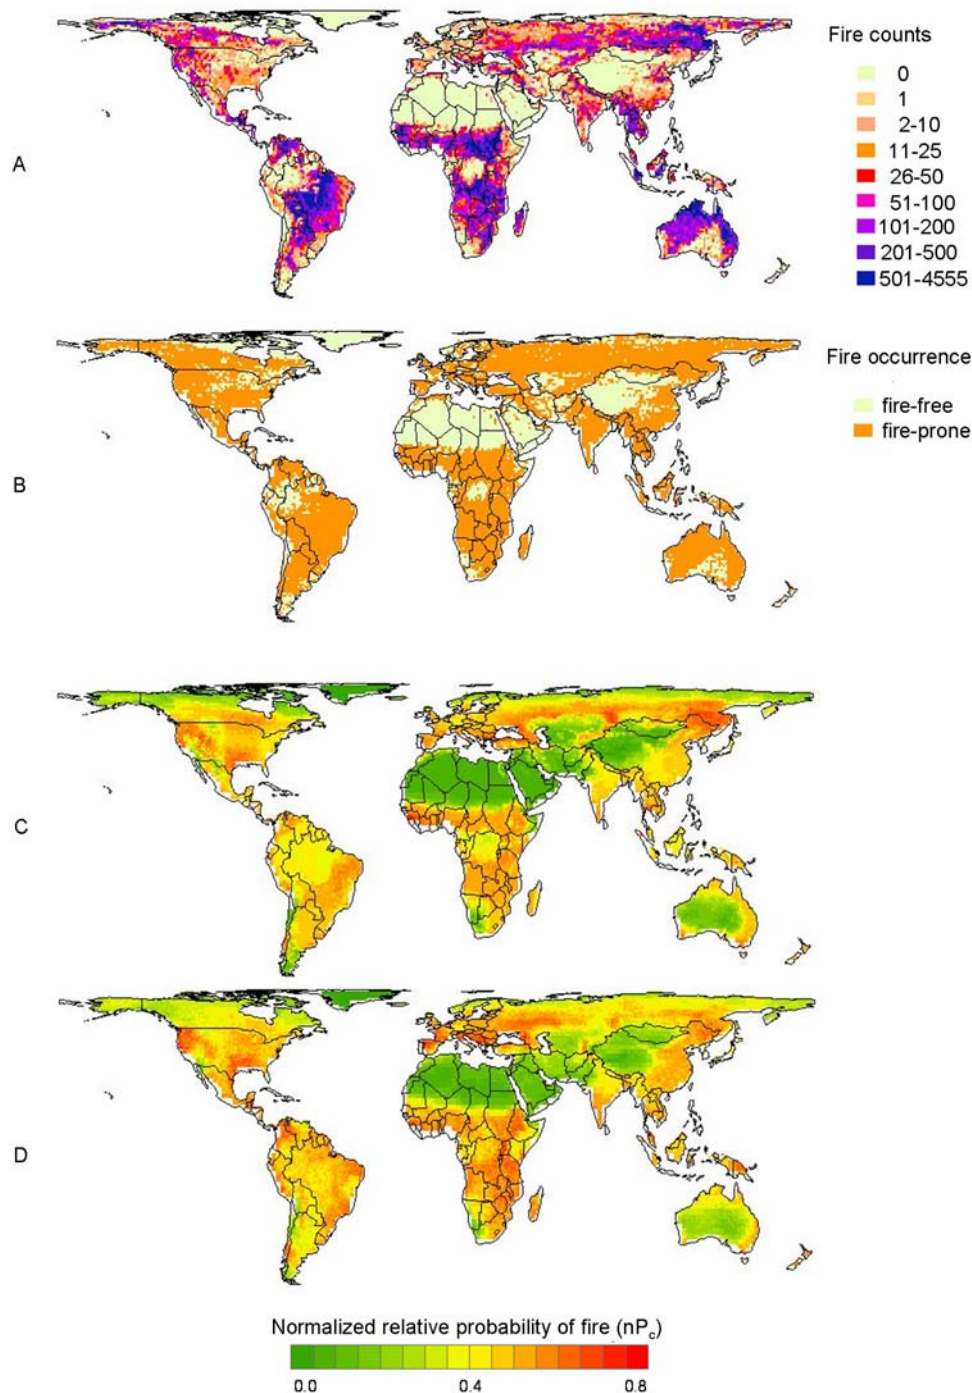

**Figure 1. The observed and modeled distribution of fire under current conditions.** (A) Cumulative counts of fire activity detected by the Along Track Scanning Radiometer (ATSR) around the world at a resolution of 100 km over 10 years. (B) The same fire data classified to represent fire-prone (orange) and fire-free (yellow) parts of the world; note that areas of white within terrestrial boundaries were clipped from the analyses to match climate data. (C) Mean of normalized relative probability of fire ( $nP_c$ ) for ten FIRE<sub>NPP</sub> sub-models of fire-prone parts of the world under current conditions. (D) Mean of normalized relative probability of fire ( $nP_c$ ) for ten FIRE<sub>noNPP</sub> sub-models of fire-prone parts of the world under current conditions.

doi:10.1371/journal.pone.0005102.g001

GFDL CM2.1 [31] General Circulation Model (GCM) historical simulations (1961 to 1990) and from observed climate normals (1950 to 2000) provided by WorldClim to generate statistical estimates from GAMs (see *Regression modeling*, below and Text S3, Figure S3). The GFDL CM2.1 is a global coupled climate model developed at NOAA's Geophysical Fluid Dynamics Laboratory

and was designed to simulate oceanic and atmospheric climate and variability over a multi-century temporal extent, at a diurnal resolution [31]. WorldClim is a dataset of interpolated climate surfaces generated using thin-plate smoothing splines from weather station data recorded around the world [30]. The GFDL CM2.1 and WorldClim-based models had very similar

**Table 1.** Environmental variables used in regression analyses.

| Variable                             | Description and Units                                                                                                    |
|--------------------------------------|--------------------------------------------------------------------------------------------------------------------------|
| <b>Climate</b>                       | Derived from monthly temperature and rainfall values                                                                     |
| Annual mean temperature              | °C                                                                                                                       |
| Mean diurnal range                   | mean of monthly (max temp–min temp), °C                                                                                  |
| Isothermality                        | mean diurnal range/temperature annual range ( $\times 100$ )                                                             |
| Temperature seasonality              | standard deviation of temperature ( $\times 100$ )                                                                       |
| Maximum temperature of warmest month | °C                                                                                                                       |
| Minimum temperature of coldest month | °C                                                                                                                       |
| Temperature annual range             | maximum temperature of warmest month – minimum temperature of coldest month, °C                                          |
| Mean temperature of wettest month    | °C                                                                                                                       |
| Mean temperature of driest month     | °C                                                                                                                       |
| Mean temperature of warmest month    | °C                                                                                                                       |
| Mean temperature of coldest month    | °C                                                                                                                       |
| Annual precipitation                 | mm/year                                                                                                                  |
| Precipitation of wettest month       | mm/day                                                                                                                   |
| Precipitation of driest month        | mm/day                                                                                                                   |
| Precipitation seasonality            | coefficient of variation                                                                                                 |
| Precipitation of warmest month       | mm/day                                                                                                                   |
| Precipitation of coldest month       | mm/day                                                                                                                   |
| <b>Vegetation</b>                    |                                                                                                                          |
| Net primary productivity (NPP)       | amount of solar energy converted to plant organic matter through photosynthesis (g C per 0.25 decimal degree cell/year). |
| <b>Ignitions</b>                     |                                                                                                                          |
| Lightning flash density              | flashes/km <sup>2</sup> /day                                                                                             |
| Human footprint                      | normalized gradient of human influence (0 to 100)                                                                        |

doi:10.1371/journal.pone.0005102.t001

shapes and effect sizes, so given this consistency, we built our wildfire occurrence models from the GFDL CM2.1 historical simulation data, from which future fire could then be projected seamlessly using global 30-year climate averages of variables simulated for time periods 2010–2039, 2040–2069, and 2070–2099. The three time periods of simulated future data used in our study represent future climate conditions corresponding to increasing concentrations of CO<sub>2</sub>.

The GFDL CM2.1 simulations for historical and future climate conditions were generated with a resolution of 2 degrees [31] and re-gridded to a 100-km resolution across the globe in order to provide a standardized format compatible with the resolution of this study (i.e., no statistical downscaling was performed). Historical model simulations (pre-2000) corresponded to the Coupled Model Inter-comparison Project “Twentieth Century Climate in Coupled Models” or 20C3M scenarios [38] which represent the best efforts to reproduce observed climate over the past century. Future GFDL CM2.1 simulations (2010–2100) used here for fire-climate change projections were forced by the IPCC Special Report on Emission Scenarios (SRES, [28]) mid-high (A2) emission scenario, in which CO<sub>2</sub> concentrations reach 830 ppm by 2100. A lower emissions scenario, B1, which can be viewed as a proxy for stabilizing atmospheric CO<sub>2</sub> concentrations at or above 550 ppm by 2100, was also examined for comparison. Because of the known variability in and among GCM outcomes, we also compared the GFDL CM2.1 future projections of the most significant climate variables identified in the regression models with simulations from 15 other atmosphere-ocean general circulation models (AOGCMs) archived by the IPCC Fourth

Assessment Report Working Group 1 Program for Climate Model Diagnostics and Intercomparison (PCMDI) database as a simple assessment of uncertainty in the GFDL-based fire projections.

**Vegetation.** We quantified the broad-scaled distribution of flammable vegetation using NPP (Figure S4). Measures of NPP represent the amount of solar energy converted to plant organic matter through photosynthesis quantified as elemental units of carbon per unit time and area, whereas vegetation to burn is ostensibly the standing stock of biomass represented as units of carbon per area. The approximately linear relationship between NPP and biomass [39] invites the use of NPP as a metric of flammable vegetation, since detailed spatially-gridded, globally extensive measures of biomass are not readily available [39]. Mapped global NPP was provided by the Carnegie-Ames-Stanford Approach (CASA) terrestrial carbon model [40] at a resolution of 0.25 degrees. Estimates of NPP can vary according to the data and method used; here we used estimates created by Imhoff and Bounoua [32] using climatology, land cover, solar radiation, soil texture and vegetation data (AVHRR from 1982–1998) described therein. We aggregated the raw values to our 100-km sampling grid using the maximum NPP value recorded from each pixel. Areas of persistent snow cover (136 pixels) for which no NPP data were available were given a value of zero.

**Ignitions.** We examined the potential for human ignition to limit fire distribution using the Human Footprint (HF) dataset from the Last of the Wild Project [33] as a proxy for ignition potential. The HF describes human population pressure, land use and infrastructure, and access. Lightning, the other major cause of ignitions, was assessed using the NASA Global Hydrology and

Climate Centre Lightning Team's high resolution annual lightning climatology which reports annual flash rates per km<sup>2</sup> from data collected between 1995 and 2005 [34]. The results of a supplemental analysis indicated that there were few areas of the planet where ignition may be a limiting factor for the 10-year 100-km resolution of our study (Text S4). Of note, the ignition indices we used did not distinguish specific lightning characteristics or human behaviors required for fire ignition. Although ignition potential was almost never limiting, we still included ignition agents in the regression models to test whether they reflected any variation in the likelihood of fire occurring.

## Regression modeling

To estimate environmental controls of fire occurrence, we chose a used-versus-available sampling design analogous to resource selection functions used in studies of wildlife distribution [41]. This design allowed us to quantify the particular resources and conditions conducive to fire by contrasting pixels where fires occurred against a random sample of pixels using statistical models that estimate a relative probability of occurrence. We did not follow a used-versus-unused design because our comparison between ATSR fire data and the Canadian large fire database (Text S2, Figure S2) demonstrated that despite the overall similarity between the databases, fires detected by ATSR during the 1996–2006 time period do not represent *all* pixels that are fire-prone. We used GAMs [42] for statistical modeling in R [43] to provide flexibility in describing nonlinear relationships between fire occurrence and environmental variables.

For the FIRE<sub>NPP</sub> (explicitly including biomass to burn) and FIRE<sub>noNPP</sub> (allowing climate to explain both biomass and environmental conditions) scenarios, our sub-model ensemble approach limited spatial structure in the data, included among-sample variability, and allowed model cross-validation. Addressing spatial dependence was particularly important since spatial data require careful consideration in statistics due to the effect of autocorrelation on variable [44,45] and model [46] selection. Data for each sub-model were selected by taking a 15% random sample ( $n = 1\ 260$ ) with replacement from the 'used' data (pixels where fire was detected) and the equivalent number of samples from the 'available' data (all pixels). We chose the 15% sample fraction since variograms of response (fire) and predictor (climate and NPP) variables indicated the beginnings of a sill in semivariance at a distance of 15 to 22 pixels ( $\approx 2\ 000$  km).

We used the GAMs to identify simple and interpretable forms of candidate variables that described the distribution of fire-prone parts of the world. Our goal was to develop models that explained strong patterns of variation in fire distribution while not overfitting the observed data. In keeping with this goal, we used the Akaike Information Criterion (AIC) as a model selection tool because it is based on the principle of parsimony [47].

Multiple phases were required for model selection and development. In the FIRE<sub>NPP</sub> models, we first estimated the relationship between fire occurrence and NPP (Figure S4) to account for variation in resources to burn, and held this relationship constant for subsequent model development by using an offset term. In each of the ten sub-models, the AIC indicated that the most parsimonious form of the NPP offset term was estimated with three degrees of freedom, a measure of complexity in the shape of the relationship. After the inclusion of the NPP offset, model development proceeded identically for variable selection in FIRE<sub>NPP</sub> and FIRE<sub>noNPP</sub> scenarios. Each sub-model of the ensemble was developed using a forward selection procedure. Variables were included in an order decided *a priori* by rank according to the AIC estimated on independent

relationships between fire occurrence and each environmental variable. The most parsimonious form of the variable was subsequently selected using AIC and visual assessment of plots showing the main effect, standard error estimates, distribution of the data, and residuals. A reduction in AIC of more than six was required for the inclusion of the variable in a sub-model.

Explanatory variables strongly correlated to one another were flagged *a priori* based on scatter plots and Pearson correlation coefficients. Although multicollinearity does not affect the use of the model to infer the mean response under observed conditions, it can make interpretation of variables difficult because parameter estimates are conditional on other variables in the model, and valid predictions can only be made if multicollinearity patterns hold for the new data [48]. Therefore, as additional terms were added to each GAM, we checked for changes in the shape and explanatory power of the existing variables. Variables that entered the model earliest took priority; lower-ranked variables were omitted if they were strongly collinear and altered the existing relationships, even if they otherwise reduced AIC sufficiently.

We assessed the predictive performance of each of the FIRE<sub>NPP</sub> and FIRE<sub>noNPP</sub> sub-models using a random sub-sample cross validation method [49]. Cross validation compares model predictions of training data against a withheld set of data, and the method proposed by Johnson et al. [49] is the most appropriate for a used-versus-available sampling design: tests are done on the correlation between binned estimated values of relative probability from each model and the frequency of independent withheld values (observed) in the same bin (here, 30 bins, each with a width of 0.1). The two most important metrics of those proposed by Johnson et al. [49] were the tests indicating: i) whether the model is better than random as indicated by a slope of the regression line between the observed and estimated values significantly different from zero; and ii) whether the model fits the data well as indicated by the R<sup>2</sup> value of the relationship between these observed and estimated values.

We ranked the overall importance of explanatory variables from the ten FIRE<sub>NPP</sub> and FIRE<sub>noNPP</sub> sub-models by summarizing the number of times they were selected in the ensemble, as well as the mean change in AIC when each was removed from a given sub-model. We also plotted the shape of the dependent response to each variable to identify and interpret the dominant form of each relationship.

To illustrate the spatial distribution of fire under current climate conditions, we calculated a normalized index of relative probability scaled between zero and one from parameter estimates of the sub-model ensembles. Calculations excluded the intercept because it is not informative in the used-versus-available study design [50]. First, the relative probability for current conditions ( $rP_c$ ) for each sub-model was calculated as:

$$rP_c = \exp(\beta_1 x_1 + \dots + \beta_p x_p) \quad (1)$$

where  $\beta_p$  are the parameter estimates for each environmental variable,  $x_p$ . We then normalized these relative probabilities for each sub-model and took the mean of the ensemble. The normalized relative probability for current conditions ( $nP_c$ ) for each sub-model was calculated as:

$$nP_c = (rP_c - \min(rP_c)) / (\max(rP_c) - \min(rP_c)) \quad (2)$$

## Projection of global fire distribution under future climate conditions

Parameter estimates from the GAMs were applied to future climate simulations to generate projections of future fire



distribution. Future climate conditions were estimated for the time periods 2010–2039, 2040–2069, and 2070–2099 using the SRES A2 and B1 emissions scenarios. Several methods are available to generate climate change projections from AOGCM data [51], for example, by using output directly generated by AOGCMs or by adding an anomaly or delta value, calculated as the difference between future and present conditions as simulated by an AOGCM, to observations. We examined these two approaches and found that, because of the consistency between fire-climate relationships estimated for observed and simulated current climate conditions (Text S3, Figure S3), the first of these approaches would provide equivalent information to the second, while retaining the spatial correlation inherent to the physical model that generated the simulations.

The two GAM ensembles present different ways to think about the future of fire. The FIRE<sub>NPP</sub> model depicts what the change in fire distribution might be if the future global pattern of NPP remained constant; we did not generate climate change projections from the CASA productivity models, so NPP was essentially held constant in our FIRE<sub>NPP</sub> model projections. This scenario is obviously unrealistic over the longer term because of the strong links between climate and vegetation, but for near-future projections such as 2010–2039, it may be reasonable to presume a relatively constant NPP, given that climate induced changes in fire are expected to occur more quickly than substantial changes in vegetation via range shifts [52,53]. In contrast, the FIRE<sub>noNPP</sub> models predict what the future distribution of fire might be under the assumption that the climate variables in the regression models jointly describe vegetation patterns (productivity and structural form) as well as fire weather conditions. These predictions may provide an overly liberal view of the near future, because they essentially remove the dispersal constraints of vegetation change. However, projections from these FIRE<sub>noNPP</sub> ensembles could be more representative of what might be expected later in the century, such as 2070–2099.

We used a delta index ( $P_{\Delta}$ ) to assess the differences in current and future fire distributions. For the  $P_{\Delta}$  index, we first calculated the normalized relative probability of fire for the future ( $nP_f$ ) using Equation 1, but based on future climate conditions. We then quantified the changes between future and current relative probability of fire for each sub-model as:

$$P_{\Delta} = \exp(L_f - L_c) \quad (3)$$

where  $L_f = \ln(rP_f)$  and  $L_c = \ln(rP_c)$  and  $L_f$  and  $L_c$  are relative probabilities of the current and future models, respectively. A  $P_{\Delta}$  of less than one indicates a reduction in fire, whereas a value greater than one indicates an increase. We calculated three delta indices,  $P_{\Delta1039}$ ,  $P_{\Delta4069}$ , and  $P_{\Delta7099}$ , for time periods 2010–2039, 2040–2069, and 2070–2099, restricting the ranges of climate values for future projections to those of the training models to avoid spurious prediction. Since analogues existed for virtually all future climate values, this restriction did not overly constrain projections. We also removed the terms estimating the relationship between fire occurrence and lightning flashes from the sub-models where it was selected, as no information was available to estimate future lightning patterns from AOGCM simulations.

Lastly, we identified potential “hotspots of change” where fire was projected to i) invade, by increasing in locations where current probabilities of fire were low; and ii) retreat, by decreasing in locations where current probabilities of fire were high. To highlight the spatial extent and specific locations with the most potential for near-term shifts, we mapped the distributions of fire invasion and retreat for scenario A2 at time period 2010–2039

from the FIRE<sub>NPP</sub> ensembles (i.e.,  $P_{\Delta1039}$ ), masking out regions of the globe with NPP currently less than 96 gC/m<sup>2</sup>/year (e.g., Arctic, Sahara, Greenland). Although this excludes ~21% of terrestrial lands that now lack biomass to burn, it also underestimates the amount of future fire invasion into areas where vegetation could begin to establish in the next few decades. Selection of the  $nP_c$  threshold values to isolate areas with relatively low (for invasion) and high (for retreat) current probabilities of fire was based on the distribution in values of modeled fire probabilities around the median value of the current FIRE<sub>NPP</sub> ensemble.

## Results

### Statistical modeling of present-day influences on fire distribution

Statistical modeling using the GAMs indicates that both resources and conditions contribute to discriminating fire-prone parts of the world, with similar relationships in both FIRE<sub>NPP</sub> and FIRE<sub>noNPP</sub> model ensembles (Table 2, Text S3, Figure S3). Vegetation NPP had the strongest single relationship of any predictor variable to the distribution of fire (Table 2, Figure S4), and eleven additional predictors were selected in both FIRE<sub>NPP</sub> (after accounting for NPP) and FIRE<sub>noNPP</sub> ensembles (Table 2). The maximum number of predictors included in a single sub-model was seven, and this occurred only once; the mode was five. Estimated degrees of freedom for the majority of variables ranged between one and five, generally resulting in simple response curves. There were limited differences between the predictors selected in the FIRE<sub>NPP</sub> and FIRE<sub>noNPP</sub> ensembles (Table 2) and between the spatial distributions of expected fire probabilities (Figures 1C and 1D). For example, temperature seasonality was only selected in FIRE<sub>NPP</sub> models but a closely allied variable, temperature annual range, was selected in both FIRE<sub>NPP</sub> and

**Table 2.** The ranked importance of variables selected in FIRE<sub>NPP</sub> and FIRE<sub>noNPP</sub> sub-models based on the number of times the explanatory variable was selected (SEL) and the mean change in AIC value, which was used to measure the relative amount of variation explained.

| Variable                                         | FIRE <sub>NPP</sub> |       | FIRE <sub>noNPP</sub> |       |
|--------------------------------------------------|---------------------|-------|-----------------------|-------|
|                                                  | SEL*                | AIC*  | SEL                   | AIC   |
| Net primary productivity                         | 10                  | 125   | na                    | na    |
| Mean temperature of warmest month                | 9                   | 16    | 10                    | 30    |
| Annual precipitation                             | 7                   | 14    | 10                    | 79    |
| Mean temperature of wettest month                | 5                   | 13    | 4                     | 10    |
| Temperature seasonality/temperature annual range | 3/2 <sup>#</sup>    | 14/25 | 0/3                   | na/12 |
| Mean diurnal range                               | 3                   | 10    | 4                     | 15    |
| Precipitation of driest month                    | 3                   | 7     | 3                     | 12    |
| Lightning flash density                          | 2                   | 13    | 5                     | 10    |
| Mean temperature of driest month                 | 2                   | 7     | 3                     | 12    |
| Precipitation of coldest month                   | 1                   | 13    | 0                     | na    |
| Human footprint (HF)                             | 1                   | 10    | 6                     | 12    |

\*Explanatory variables separated by “/” are highly correlated and were never selected together in a model, but represented similar environmental trends in current conditions.

doi:10.1371/journal.pone.0005102.t002

FIRE<sub>noNPP</sub> models (Table 2). The human footprint (HF) metric and lightning flash density explained some variability in fire occurrence, but only when NPP was not included in the model (Table 2).

Model cross-validation indicated good discrimination of fire-prone parts of the world, with tests showing sub-models of both the FIRE<sub>NPP</sub> and FIRE<sub>noNPP</sub> ensembles to be significantly better than random. This diagnostic was demonstrated by slopes of the correlations between estimated and observed values of relative probability that were all significantly different from zero, and  $R^2$  values between estimated and observed data ranging between 0.96 to 0.98 for the FIRE<sub>NPP</sub> model ensemble and 0.94 to 0.98 for FIRE<sub>noNPP</sub> ensembles. Visually, the FIRE<sub>NPP</sub> model ensemble provided finer discrimination of fire-prone parts of the world (Figures 1C and 1D), especially in regions where resource levels are high such as the tropics, illustrating areas where climate variables (FIRE<sub>noNPP</sub>) were less able than NPP (FIRE<sub>NPP</sub>) to capture variation in fire occurrence. For example, the FIRE<sub>noNPP</sub> ensemble predicted little variation in the probability of fire across the Amazon and Congo regions of South America and Africa (Figure 1D) despite containing large contiguous patches of fire-free areas at the centre of these regions in the observed data (Figure 1B).

### Projection of global fire distribution under future climate conditions

Given the success of the statistical models in reproducing present-day fire distributions, we then applied the models to estimate the change in future fire probabilities ( $P_{\Delta}$ ) resulting from the A2 (mid-high emissions) and B1 (lower emissions) climate projections generated by the GFDL CM2.1 AOGCM. Projected decreases in fire were indicated by values less than 1.0 and increases by values greater than 1.0 (Figure 2 and Figures S5, S6). For the A2 scenario, projected changes in fire over all time periods ranged from 0.5 to 2.8, depending on the statistical sub-model used and the geographic location; corresponding results for B1 ranged from 0.7 to 1.9 (Figure 2 and Figures S5, S6). Despite changes in fire probabilities that deviated progressively more from current conditions over time and with a higher emissions scenario, Figure S6 illustrates roughly equivalent increases and decreases in fire probability over the globe. The coarse spatio-temporal scale used for this study allowed projections of change without including finer scaled details known to affect local fire activity such as time since last fire, since the likelihood of a fire burning through all biomass available in each 10 000 km<sup>2</sup> pixel is relatively unlikely.

It is important to note that the projections shown here are based on simulations from one AOGCM only. This was a deliberate

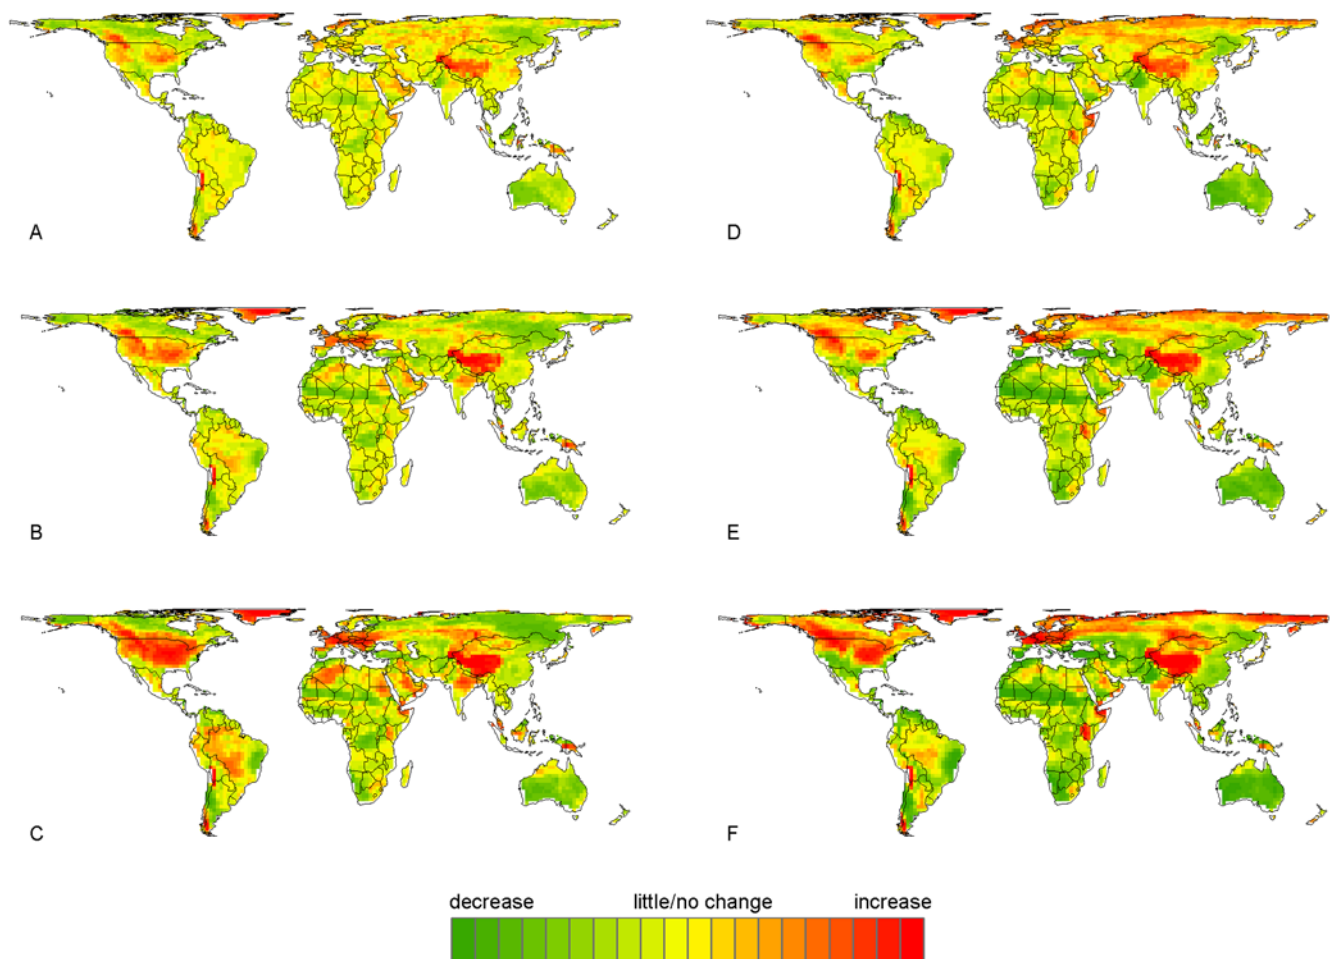

**Figure 2. Changes in the global distribution of fire-prone pixels under the A2 (mid-high) emissions scenario.** An increase from current conditions (red) is indicated by a  $P_{\Delta}$  greater than unity, little or no change (yellow) is indicated by a  $P_{\Delta}$  around unity, and a decrease (green) is indicated by a  $P_{\Delta}$  less than unity. Panels show the mean  $P_{\Delta}$  for the ensemble of ten FIRE<sub>NPP</sub> (A–C) and FIRE<sub>noNPP</sub> (D–F) sub-models. Climate projections include 2010–2039 (A, D), 2040–2069 (B, E) and 2070–2099 (C, F). doi:10.1371/journal.pone.0005102.g002

choice, as our primary purpose was to describe the development of the statistical modeling technique and explore its potential application to future projections of wildfire. Some measure of the robustness of these projections can nonetheless be obtained through comparison of GFDL CM2.1 projections with the average of those projected by simulations of 15 other AOGCMs archived in the PCMDI database for the three most significant climate predictors identified by the statistical analysis: mean temperature of the warmest month, annual precipitation, and mean temperature of the wettest month (Table 2). This comparison, shown in Figures S7, S8, S9, suggests that our results may in fact be indicative of the general magnitude and direction of projected changes expected from a larger number of AOGCMs. Specifically, the projections used here appear relatively conservative, close to, or below the AOGCM ensemble average for the two temperature-related variables. For precipitation, GFDL CM2.1 projections tended to lie in the lower half of the distribution, suggesting a slight tendency towards drier conditions.

Less change in  $P_{\Delta}$  values occurred in  $FIRE_{NPP}$  than  $FIRE_{noNPP}$  sub-model ensembles, largely as a function of including constant vegetation patterns in the  $FIRE_{NPP}$  scenario. Both scenarios showed increasingly higher variability through 2010–2039, 2040–2069, and 2070–2099 conditions (Figure S6), which translated to fire distributions that were increasingly dissimilar to those under current conditions. In terms of geographic location, vast portions of the continental land area, particularly across North America and Eurasia, are projected to experience relatively large changes in fire probabilities (Figure 2 and Figure S5). There were obvious differences in  $P_{\Delta}$  values predicted by  $FIRE_{NPP}$  and  $FIRE_{noNPP}$  models in northern regions of North America and Eurasia (Figure 2 and Figure S5), which can be attributed to the absence of the static NPP variable in the  $FIRE_{noNPP}$  model. The remaining parts of the world had relatively similar changes predicted by the  $FIRE_{NPP}$  and  $FIRE_{noNPP}$  models.

Areas of projected fire invasion and fire retreat for the near-term (2010–2039) given A2 emissions using the  $FIRE_{NPP}$  ensemble are shown in Figure 3. As described earlier, invasions are defined by increasing probability of fire in locations with relatively low current probabilities, and retreat by decreasing probability of fire in locations with relatively high current probabilities. Current fire

probabilities (Figure 1C) exhibited a median of 0.42, and values 0.08 above and below the median were selected as cutoffs for current low and high probabilities, respectively. Of the terrestrial biosphere, 79% of lands met our conservative minimum NPP criteria, 21% were classified as currently low probability areas susceptible to fire invasion, and 38% as high probability areas susceptible to fire retreat. Although other criteria are worth considering, it appears likely that a substantial fraction of all terrestrial lands on the planet (one quarter, or 34 M km<sup>2</sup> based on the climate projections used here), may be classified with invasion (~9% of lands) or retreat (~19% of lands) of fire (Figure 3).

## Discussion

### Global pyrogeography under current conditions

Wildfire-prone parts of the world span ecological systems ranging from tropical savannas to boreal forests, characterized by the interplay of key variables that represent resources and conditions required for fire activity. As one would expect, we found that biomass to burn is necessary for wildfires to occur: low levels of vegetative resources to burn, here represented by low NPP, resulted in a low probability of fire in areas such as desert and tundra. In our statistical models, the likelihood of fire increased with vegetation productivity. This trend has a limit, however, as other environmental factors become constraints on fire activity. For example, although some of the most biomass-rich forests of the planet, such as in peripheral Amazonia and Indonesia, can be fire-prone, the majority of closed tropical evergreen forests of the central Amazon and the Congo are relatively fire-free. These fire-free areas with high NPP rarely experience environmental conditions that promote biomass burning — seasonality, episodic wind events, low moisture levels, or ignitions — given that burnable resources are readily available. Even during anomalously dry periods, the closed canopy structure of these biomass-rich rainforests maintains a relatively high humidity that inhibits burning [54,55]. Our analyses identified three dominant climate conditions that represent these constraints at a macro-scale: mean temperature of the warmest month, annual precipitation, and mean temperature of the wettest month.

The spatial variability in fire occurrence observed across tropical forests emphasizes the inextricable relationship between

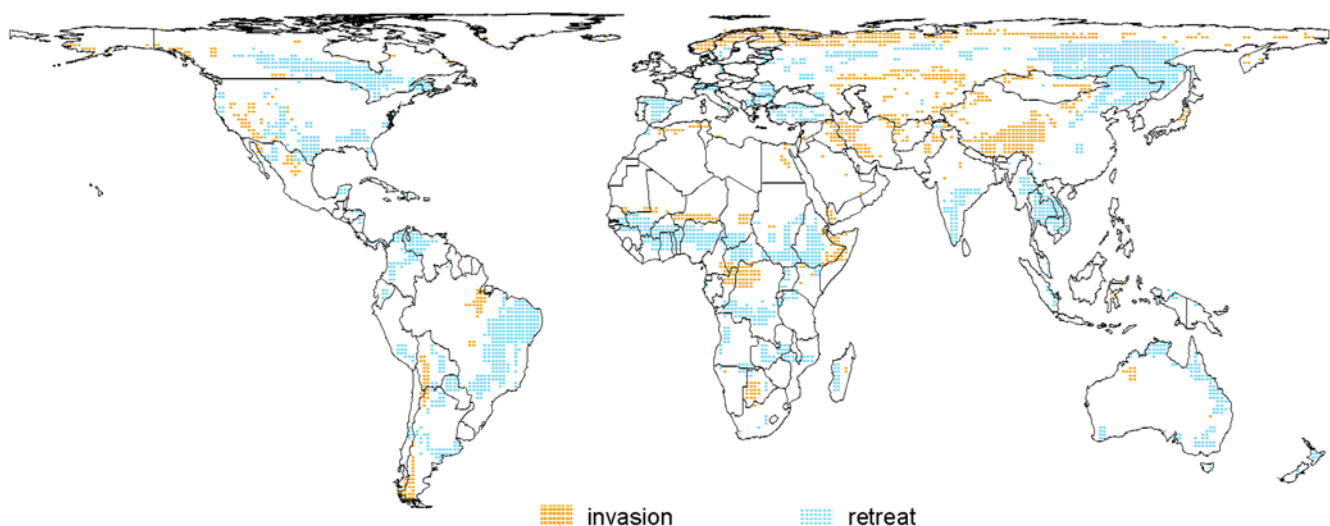

**Figure 3. Potential invasion and retreat of fire.** The invasion (orange) and retreat (blue) of fire projected by 2010–2039 under the A2 (mid-high) emissions scenario and based on the  $FIRE_{NPP}$  ensembles. Invasion was constrained to places with existing vegetation. doi:10.1371/journal.pone.0005102.g003



humans and fire, in that fire is dispersed by humans into areas where resources and conditions would not typically support it [1,55]. Humans have introduced fire to biomass-rich areas either by igniting fires within fire-conducive windows of time [56] or by altering the virtually “fire-proof” vegetation structure [54], often in association with drought [57]. Although some tropical areas have been relatively fire-prone for centuries [58,59], many areas of wet tropical rainforest which only rarely experienced fire in the past now burn due to accelerating anthropogenic pressure [60]. We found that the overall heterogeneity of fire occurrence in biomass-rich areas resulted in an asymptotic, yet somewhat decreasing, probability of burning at the highest NPP levels. The accompanying variation among our sub-models demonstrates localized differences in fire activity reflecting very high-NPP areas as ‘fire frontiers’, or areas undergoing rapid changes in human and fire activity. Both wet and wet-dry tropical forests are now at the frontier of anthropogenic development, an ever-advancing zone that has long been equated with elevated biomass burning due to land clearing by humans [61].

If the influence of humans essentially means that all areas of the world supporting sufficient biomass are potentially burnable and few are ignition-limited, how do we interpret the influence of environmental conditions on wildfire activity? Clearly, human activity has been breaking down pyrogeographic barriers [3,60,61] that regulate lightning-caused fire since the first use of fire by humans, but our findings indicate that environmental resources and conditions still play strong roles in determining the global distribution of vegetation wildfire. Though the spatial patterns of people, lightning, and biomass are related to some extent, resources and climate-based variables were stronger constraints on fire occurrence than ignition-related variables at the coarse resolution we used. This being said, additional change in the dynamics of fire management and/or human land use will almost certainly contribute to altering the future global distribution of fire alongside climate, presenting a wildcard in future fire-proneness.

Our finding that simple temperature and precipitation gradients consistently surface as major controls of fire supports an analogy between the broad distributions of fire-prone areas and Whitaker’s [62] seminal categorization of global biomes based on these two environmental gradients. However, our study also emphasizes the potential use of synthetic variables to describe the coincident interactions of energy and water balances. Though some climate variables considered in our analysis combined elements of precipitation and temperature such as mean temperature of the wettest month, none explicitly calculated effective levels of moisture. For instance, water balance metrics [63,64] have been shown to provide good discrimination of the occurrence, abundance, and diversity of some biota at macro-ecological scales [64]. Dwyer et al. [14] showed that at a global scale the number of months per year exhibiting a water deficit was strongly associated with observed fires. The development of global versions of existing fire-weather/climate metrics such as the Canadian Fire Weather Index [65], Nesterov Index, or novel metrics such as fire-driven deforestation potential [8], would also inform syntheses of fire patterns at broad scales.

### Global climate change and fire

Our study demonstrates a new method of examining the future of global fire activity using AOGCM-based climate projections to drive statistical models of fire activity. Initial application to simulations by the GFDL CM2.1 model under mid-high and lower anthropogenic emissions provides some striking future outcomes that encourage further development and application of this framework to more fire metrics and a broader set of AOGCM

simulations. Under the future climate conditions we examined, a major redistribution of fire-prone areas occurs, with larger changes observed under scenarios of higher emissions and further into the future. Yet the net outcome implies that while parts of the world may experience regional increases in fire activity, others experience roughly equivalent decreases. Although recent perceived increases in fire through many parts of western North America are causing ecological, economic, and social concern [6,66], our results suggest a challenge to any simplistic view that climate change will lead to more fire in all locations. Rather, we find that the interplay of changing temperature and precipitation might result in a rearrangement of global fire probabilities overall, even as global temperature increases. This does not however, imply that ecological or social impacts will be minor. Since projected changes were highly regional and our simulations suggest the potential for differences that increase across 2010–2039, 2040–2069, and 2070–2099, fire activity at a given location may become progressively altered from current conditions be it through an increase or a decrease in the likelihood of its occurrence.

Although our study illustrates the magnitude and types of changes in fire that could be expected in the near future, the quantitative findings should be interpreted with a suite of caveats. As already mentioned, additional projections based explicitly on output from multiple AOGCMs are clearly necessary. Our statistical models do not incorporate fire-climate-vegetation feedbacks that could have a further warming effect on global climate (e.g., through fire-related emissions); in this sense our projections should be seen as conservative in the amount of potential change that will occur. In addition, changes in climate will affect other natural disturbances such as insect outbreaks that kill or defoliate trees [67], and the result of interactions between these phenomena and fire activity will be very difficult to predict. Fire occurrence is only one parameter of a fire regime, and additional studies are necessary to examine potential changes in other components such as area burned, fire intensity or seasonality. Furthermore, the evolution of fire management through suppression techniques, public awareness, and policy changes is also likely to change fire activity in the future.

Projections of fire occurrence were carried out using a pair of modeling ensembles, with one scenario holding biomass structure constant at current levels ( $FIRE_{NPP}$ ), and one scenario where vegetation essentially tracks climate changes ( $FIRE_{noNPP}$ ). In the latter, larger changes were observed in fire probabilities, generated by the compensatory, larger overall effect sizes estimated for climate variables in the  $FIRE_{noNPP}$  models, including annual precipitation and mean temperature of the warmest month. Emergent differences between projections from  $FIRE_{NPP}$  and  $FIRE_{noNPP}$  ensembles were most apparent in the far north of North America and Eurasia suggesting that some environmental conditions conducive to combustion and fire spread are likely to increase there over the next decades, yet the limited availability of biomass to burn, as demonstrated by models where NPP was held constant, could buffer dramatic near-future increases in fire activity. The remainder of the world showed similar changes in the future distribution of fire for both model ensembles. We contended earlier that since the  $FIRE_{noNPP}$  ensembles for 2070–2099 represented a scenario that notionally included a shift in biomass patterns, it was more appropriate for longer-term projections due to the inevitable but slow range shifts in vegetation expected with climate change [52].

We classified areas projected to transition from low to high probabilities of fire in the near future (2010–2039) as at risk of fire invasion and areas projected to transition from high to low as at

risk of fire retreat. An ecosystem that has experienced little or no fire which then incurs a higher probability or frequency of fire, such as a desert or rainforest, may be fire-sensitive and particularly susceptible to changes in community structure or ecosystem state due to increases in fire activity [60,68,69]. At the other end of the spectrum, decreases in fire may also affect species or communities that have adaptations that enable them to thrive in fire-prone ecosystems and may depend on narrow ranges of fire intervals for persistence. In nature, species are not simply adapted to fire, but to a given set of parameters that represent a fire regime. Our fire invasion and retreat metrics thus identify potential ‘hotspots of change’ where altered fire-proneness may catalyze relatively rapid changes in ecosystem structure, acting alongside the more gradual effect of climate on individual species tolerances. In these hotspots of change, it would be particularly valuable to quantify changes in additional fire regime parameters, for example fire intensity, a measure that includes not only changes in the conditions for fire, but also the resources available to burn under those conditions.

The rate at which fire activity may change in the future relative to rates of climate-induced changes in vegetation ranges is highly uncertain. Rapid vegetation changes are possible, such as when non-native grasses rapidly invade desert systems under suitable environmental conditions [70,71]. However, the potential for relatively rapid and large changes in fire probabilities seen in our FIRE<sub>NPP</sub> ensembles for 2010–2039 illustrate that in the near term, fire activity could change faster than many terrestrial species may be able to accommodate. For models projecting the future of species distributions, especially that of plants [72], such rapid change underlines the importance of developing methods to explicitly integrate how fire activity affects vegetation, in addition to species range changes based on plant-climate relationships alone.

Our models provide global, quantitative projections of wildfire that can be compared to existing studies of climate change to gauge not only their agreement in scope and location, but also disparities that can direct refinements in subsequent studies. For example, using a relatively simple parameterization of fire in a DGVM driven by input from multiple AOGCMs, Scholze et al. [15] describe global changes in wildfire frequency that align with our estimates in many areas, also generally supporting the concept of a net global balance between increases and decreases in future fire. In fact, such consilience between two very different modeling frameworks raises the possibility of new hypotheses about energetically-regulated limits that amount to a global “carrying capacity” for fire. We are unaware of other global studies estimating climate-induced changes in wildfire, so our statistical framework provides a new, much-needed and complementary approach to predicting future global pyrogeography.

Studies of climate-induced changes in fire have been implemented at regional scales, and these can also be used to interpret our results. For example, a DGVM and output from a GCM was used to simulate future fire regimes in Alaska, predicting a relative decrease in future area burned in central Alaska and increases in future area burned along the southern and western coasts [73], which match projections from our models. Using a regression approach similar to ours, anticipated changes in fire return interval were shown across boreal regions of North America by the end this century [26] that correspond most closely with our models where biomass was unconstrained. High-resolution regional climate simulations were used to suggest increased future fire risk across northern and eastern Australia [27], which aligns with outcomes from our models with biomass constrained, though our projections suggest more of a long-term decrease in fire in our unconstrained models. Finally, projected changes in fire weather

indices for North America and Europe using simulated data from the Canadian GCM [74] are in accord with our projections in central and eastern France, but not in Fennoscandia.

## Conclusion

In this study, we first developed a statistical modeling framework capable of reproducing current-day global fire patterns and describing the influence of underlying environmental controls on those patterns. We then examined the global scope of, and potential regions likely to be affected by, severely altered probabilities of fire using statistical models and an illustrative set of climate projections. Our global pyrogeography provides a new, multivariate quantification of the current distribution of vegetation fires across the planet that is both coherent with our knowledge of global fire patterns and capable of projecting potential changes in wildfire for the future.

The original impetus for this work was to complement the subjective, expert-driven assessment of global fire regimes devised in the Global Fire Assessment, spearheaded by The Nature Conservancy [75]. Our hope is that this approach to global pyrogeography will continue to develop as a framework for providing robust estimates of potential perturbations in global fire patterns and future ecosystem changes, which could then complement and inform global DGVM simulations. Our proposed framework would also benefit from the inclusion of more advanced assessment of fire-human dynamics, the use of additional fire metrics (e.g., area burned, intensity, seasonality), updates in global fire products (e.g., MODIS), and the quantification of AOGCM-related uncertainty [76], as this information becomes available. Given the dearth of information on global fire in the context of climate change [77], the utility and importance of coarse spatiotemporal studies can only increase, providing informative and synthetic insights about global wildfire and the extent of changes that could be expected in the future.

## Supporting Information

**Figure S1** The distribution of fire detected by MODIS. Data are displayed as the occurrence of fire at a spatial resolution of 100 km, between November 2000 and December 2006. Note that areas of white within terrestrial boundaries were clipped to match the fire-climate analyses.

Found at: doi:10.1371/journal.pone.0005102.s001 (0.40 MB TIF)

**Figure S2** Spatial comparison between a decade of ATSR fire data and fires recorded in the Canadian Large Fire Database (LFDB). Grey represents areas where no fire was detected, red shows areas where fire was detected in both the ATSR and LFDB, orange shows areas where fires were only detected by ATSR, and yellow shows areas where fires were only documented in the LFDB.

Found at: doi:10.1371/journal.pone.0005102.s002 (0.09 MB TIF)

**Figure S3** The modeled response,  $f(x)$ , for the five most highly ranked climate variables of the FIRE<sub>NPP</sub> ensemble. Response curves were estimated from fire occurrence and simulated GFDL CM2.1 data (A), and observed WorldClim data (B). Grey lines are estimates from each of the sub-models in the ensemble and black lines are the mean of these estimates. Descriptions of climate variables are found in Table 1 of the main text. Note that plotting axes vary among the variables; the x-axis for “Annual precipitation” is presented on a log<sub>10</sub> scale.

Found at: doi:10.1371/journal.pone.0005102.s003 (0.13 MB TIF)

**Figure S4** The global distribution of NPP, and the relationship between fire occurrence and NPP estimated with the ten FIRE<sub>NPP</sub>

sub-models. Values on x-axis are presented as approximate  $g\ C/m^2/year$ , by dividing data ( $g\ C/0.25$  decimal degree cell) by  $7.7 \times 10^8$ . The values for NPP are clipped to the extent of the GFDL CM2.1 climate data used in the regression models, such that areas of white along some coast-lines indicate areas not included in the study.

Found at: doi:10.1371/journal.pone.0005102.s004 (1.09 MB TIF)

**Figure S5** Changes in the global distribution of fire-prone pixels under the B1 (low) emissions scenario. An increase from current conditions (red) is indicated by  $P_{\Delta}$  greater than unity, little or no change (yellow) is indicated by  $P_{\Delta}$  around unity, and a decrease (green) is indicated by  $P_{\Delta}$  less than unity. Panels show the mean  $P_{\Delta}$  for the ensemble of ten  $FIRE_{NPP}$  (A–C) and  $FIRE_{noNPP}$  (D–F) sub-models. Climate projections include 2010–2039 (A, D), 2040–2069 (B, E) and 2070–2099 (C, F).

Found at: doi:10.1371/journal.pone.0005102.s005 (1.38 MB TIF)

**Figure S6** Distribution in values of change in the relative probability of fire ( $P_{\Delta}$ ) under future conditions.

Found at: doi:10.1371/journal.pone.0005102.s006 (0.55 MB TIF)

**Figure S7** A comparison of mean temperature of the warmest month from 15 AOGCMs. Periods of comparison include: 2010–2039 (A), 2040–2069 (B) and 2070–2099 (C), under the SRES A2 (mid-high) emissions scenario. The GFDL CM2.1 projections (outlined) fall in the mid-range of all models - half of the models show warmer temperatures and half show cooler.

Found at: doi:10.1371/journal.pone.0005102.s007 (3.39 MB TIF)

**Figure S8** Comparison of annual precipitation from 15 AOGCMs. Periods of comparison include: 2010–2039 (A), 2040–2069 (B) and 2070–2099 (C), under the SRES A2 (mid-high) emissions scenario. The GFDL CM2.1 projections (outlined) are in the lower half of the 15 models. Although there are several models that project significantly drier conditions than GFDL CM2.1, in general by end-of-century its projections show smaller precipitation increases (across northern Europe, along the west coasts of the Americas, and in mid-Africa) than the majority of models.

Found at: doi:10.1371/journal.pone.0005102.s008 (3.87 MB TIF)

## References

- Lavorel S, Flannigan MD, Lambin EF, Scholes MC (2006) Vulnerability of land systems to fire: Interactions among humans, climate, the atmosphere, and ecosystems. *Mitigation Strategies for Global Change*; DOI 10.1007/s11027-006-9046-5.
- Chuvieco E, Giglio L, Justice C (2008) Global characterization of fire activity: toward defining fire regimes from Earth observation data. *Global Change Biology* 14: 1–15.
- Calef MP, McGuire AD, Chapin FS (2008) Human influences on wildfire in Alaska from 1988 through 2005: An analysis of the spatial patterns of human impacts. *Earth Interactions* 12.
- Malilay J (1999) A review of factors affecting the human health impacts of air pollutants from forest fires; Lima, Peru, 1988. World Health Organization.
- van der Werf GR, Randerson JT, Giglio L, Collatz GJ, Kasibhatla PS, et al. (2006) Interannual variability in global biomass burning emissions from 1997 to 2004. *Atmospheric Chemistry and Physics* 6: 3423–3441.
- Moritz MA, Stephens SL (2008) Fire and sustainability: considerations for California's altered future climate. *Climatic Change* 87: S265–S271.
- Meyn A, White PS, Buhk C, Jentsch A (2007) Environmental drivers of large, infrequent wildfires: the emerging conceptual model. *Progress in Physical Geography* 31: 287–312.
- van der Werf GR, Randerson JT, Giglio L, Gobron N, Dolman AJ (2008) Climate controls on the variability of fires in the tropics and subtropics. *Global Biogeochemical Cycles* 22.
- Giglio L, van der Werf GR, Randerson JT, Collatz GJ, Kasibhatla P (2006) Global estimation of burned area using MODIS active fire observations. *Atmospheric Chemistry and Physics* 6: 957–974.
- Kasischke ES, Hewson JH, Stocks B, van der Werf G, Randerson J (2003) The use of ATSR active fire counts for estimating relative patterns of biomass

**Figure S9** Comparison of mean temperature of the wettest month from 15 AOGCMs. Periods of comparison include: 2010–2039 (A), 2040–2069 (B) and 2070–2099 (C) under the SRES A2 (mid-high) emissions scenario. The GFDL CM2.1 projections (outlined) are relatively conservative - by the end of the century, projections are in the lower third of the 15 models.

Found at: doi:10.1371/journal.pone.0005102.s009 (3.46 MB TIF)

**Text S1** A comparison between ATSR fire data from 1996 to 2006 and MODIS Collection 5 active fire data from 2000 to 2006.

Found at: doi:10.1371/journal.pone.0005102.s010 (0.02 MB DOC)

**Text S2** A comparison between a decade of ATSR fire data and fires recorded in the Canadian Large Fire Database.

Found at: doi:10.1371/journal.pone.0005102.s011 (0.02 MB DOC)

**Text S3** Relationships estimated between historical fire occurrence and climate variables using observed (WorldClim) and simulated (GFDL CM2.1) data.

Found at: doi:10.1371/journal.pone.0005102.s012 (0.02 MB DOC)

**Text S4** Assessment to determine if ignition might limit patterns of fire occurrence, based on the Human Footprint and lightning data.

Found at: doi:10.1371/journal.pone.0005102.s013 (0.02 MB DOC)

## Acknowledgments

Thank you to The Nature Conservancy's Global Fire Initiative and NSERC for providing funding for M.A.K. to pursue this research. José Pereira kindly provided the screened ATSR World Fire Atlas data. Duarte Oom and Eric Waller provided valuable conversations during the preparation of the manuscript.

## Author Contributions

Conceived and designed the experiments: MAK MAM MAP. Analyzed the data: MAK JVD KH. Contributed reagents/materials/analysis tools: MAK MAM JVD KH. Wrote the paper: MAK MAM MAP KH.

burning - a study from the boreal forest region. *Geophysical Research Letters* 30.

- Riano D, Ruiz JAM, Isidoro D, Ustin SL (2007) Global spatial patterns and temporal trends of burned area between 1981 and 2000 using NOAA-NASA Pathfinder. *Global Change Biology* 13: 40–50.
- Le Page Y, Pereira JMC, Trigo R, da Camara C, Oom D, et al. (2007) Global fire activity patterns (1996–2006) and climatic influence: an analysis using the World Fire Atlas. *Atmospheric Chemistry and Physics Discussions* 7: 17299–17338.
- Carmona-Moreno C, Belward A, Malingreau JP, Hartley A, Garcia-Alegre M, et al. (2005) Characterizing interannual variations in global fire calendar using data from Earth observing satellites. *Global Change Biology* 11: 1537–1555.
- Dwyer E, Gregoire JM, Pereira JMC (2000) Climate and vegetation as driving factors in global fire activity. In: Beniston M, ed. *Biomass burning and its interrelationship with the climate system*. London: Kluwer Academic Publishers. pp 358.
- Scholze M, Knorr W, Arnell NW, Prentice IC (2006) A climate-change risk analysis for world ecosystems. *Proceedings of the National Academy of Sciences of the United States of America* 103: 13116–13120.
- Thonicke K, Venevsky S, Sitch S, Cramer W (2001) The role of fire disturbance for global vegetation dynamics: coupling fire into a Dynamic Global Vegetation Model. *Global Ecology and Biogeography* 10: 661–677.
- Venevsky S, Maksyutov S (2007) SEVER: A modification of the LPJ global dynamic vegetation model for daily time step and parallel computation. *Environmental Modelling & Software* 22: 104–109.
- Sitch S, Huntingford C, Gedney N, Levy PE, Lomas M, et al. (2008) Evaluation of the terrestrial carbon cycle, future plant geography and climate-carbon cycle feedbacks using five Dynamic Global Vegetation Models (DGVMs). *Global Change Biology* 14: 2015–2039.

19. Bond WJ, Woodward FI, Midgley GF (2005) The global distribution of ecosystems in a world without fire. *New Phytologist* 165: 525–537.
20. Arora VK, Boer GJ (2005) Fire as an interactive component of dynamic vegetation models. *Journal of Geophysical Research-Biogeosciences* 110.
21. Purves D, Pacala S (2008) Predictive models of forest dynamics. *Science* 320: 1452–1453.
22. Soberon J (2007) Grinnellian and Eltonian niches and geographic distributions of species. *Ecology Letters* 10: 1115–1123.
23. Parisien MA, Moritz MA (2009) Environmental controls on the distribution of wildfire at multiple spatial scales. *Ecological Monographs* 79: 127–154.
24. Dissing D, Verbyla DL (2003) Spatial patterns of lightning strikes in interior Alaska and their relations to elevation and vegetation. *Canadian Journal of Forest Research-Revue Canadienne De Recherche Forestiere* 33: 770–782.
25. Krawchuk MA, Cumming SG, Flannigan MD (2008) Predicted changes in fire weather suggest increases in lightning fire initiation and future area burned in the mixedwood boreal forest. *Climatic Change* in press.
26. Balshi MS, Mcguire AD, Duffy P, Flannigan MD, Walsh J, et al. (2008) Assessing the response of area burned to changing climate in western boreal North America using a Multivariate Adaptive Regression Splines (MARS) approach. *Global Change Biology* 14: 1–23.
27. Pitman AJ, Narisma GT, McAneney J (2007) The impact of climate change on the risk of forest and grassland fires in Australia. *Climatic Change* 84: 383–401.
28. Nakicenovic N, et al. (2000) IPCC special report on emissions scenarios. Cambridge, U.K.: Cambridge University Press.
29. Mota BV, Pereira JMC, Oom D, Vasconcelos MJP, Schultz M (2006) Screening the ESA ATSR-2 World Fire Atlas (1997–2002). *Atmospheric Chemistry and Physics* 6: 1409–1424.
30. Hijmans RJ, Cameron SE, Parra JL, Jones PG, Jarvis A (2005) Very high resolution interpolated climate surfaces for global land areas. *International Journal of Climatology* 25: 1965–1978.
31. Delworth TL, Broccoli AJ, Rosati A, Stouffer RJ, Balaji V, et al. (2006) GFDL's CM2 global coupled climate models. Part I: Formulation and simulation characteristics. *Journal of Climate* 19: 643–674.
32. Imhoff ML, Bounoua L (2006) Exploring global patterns of net primary production carbon supply and demand using satellite observations and statistical data. *Journal of Geophysical Research-Atmospheres* 111.
33. Sanderson EW, Jaiteh M, Levy MA, Redford KH, Wannebo AV, et al. (2002) The human footprint and the last of the wild. *Bioscience* 52: 891–904.
34. Christian HJ, Blakeslee RJ, Boccippio DJ, Boeck WL, Buechler DE, et al. (2003) Global frequency and distribution of lightning as observed from space by the Optical Transient Detector. *Journal of Geophysical Research-Atmospheres* 108.
35. Boschetti L, Eva HD, Brivio PA, Gregoire JM (2004) Lessons to be learned from the comparison of three satellite-derived biomass burning products. *Geophysical Research Letters* 31.
36. Giglio L, Csizsar I, Justice CO (2006) Global distribution and seasonality of active fires as observed with the Terra and Aqua Moderate Resolution Imaging Spectroradiometer (MODIS) sensors. *Journal of Geophysical Research-Biogeosciences* 111.
37. Stocks BJ, Mason JA, Todd JB, Bosch EM, Wotton BM, et al. (2002) Large forest fires in Canada, 1959–1997. *Journal of Geophysical Research-Atmospheres* 108.
38. Covey C, AchutaRao KM, Cubasch U, Jones P, Lambert SJ, et al. (2003) An overview of results from the Coupled Model Intercomparison Project. *Global and Planetary Change* 37: 103–133.
39. Kindermann GE, McAllum I, Fritz S, Obersteiner M (2008) A global forest growing stock, biomass and carbon map based on FAO statistics. *Silva Fennica* 42: 387–396.
40. Potter C, Klooster S, Myrneni R, Genovese V, Tan PN, et al. (2003) Continental-scale comparisons of terrestrial carbon sinks estimated from satellite data and ecosystem modeling 1982–1998. *Global and Planetary Change* 39: 201–213.
41. Manly BFJ, McDonald LL, Thomas DL, McDonald TL, Erickson WP (2002) Resource selection by animals. London: Kluwer Academic Publishers. 221 p.
42. Hastie TJ, Tibshirani RJ (1990) Generalized additive models. London: Chapman and Hall.
43. R (2008) R: A Language and Environment for Statistical Computing. Vienna, Austria: R Foundation for Statistical Computing.
44. Legendre P, Dale MRT, Fortin MJ, Gurevitch J, Hohn M, et al. (2002) The consequences of spatial structure for the design and analysis of ecological field surveys. *Ecography* 25: 601–615.
45. Currie DJ (2007) Disentangling the roles of environment and space in ecology. *Journal of Biogeography* 34: 2009–2011.
46. Hoeting JA, Davis RA, Merton AA, Thompson SE (2006) Model selection for geostatistical models. *Ecological Applications* 16: 87–98.
47. Burnham KP, Anderson DR (2002) Model selection and multimodel inference: a practical information-theoretic approach. New York: Springer. 488 p.
48. Neter J, Wasserman W, Kutner MH (1989) Applied linear regression models. Boston: Irwin. 667 p.
49. Johnson CJ, Nielsen SE, Merrill EH, McDonald TL, Boyce MS (2006) Resource selection functions based on use-availability data: Theoretical motivation and evaluation methods. *Journal of Wildlife Management* 70: 347–357.
50. Hosmer DW, Lemeshow S (2000) Applied Logistic Regression. New York: Wiley and Sons, Inc. 375 p.
51. IPCC-TGICA (2007) General guidelines on the use of scenario data for climate impact and adaptation assessment. Version 2. 66 p.
52. Clark JS, Fastie C, Hurr G, Jackson ST, Johnson C, et al. (1998) Reid's paradox of rapid plant migration - Dispersal theory and interpretation of paleoecological records. *Bioscience* 48: 13–24.
53. Neilson RP, Pitelka LF, Solomon AM, Nathan R, Midgley GF, et al. (2005) Forecasting regional to global plant migration in response to climate change. *Bioscience* 55: 749–759.
54. Cochrane MA, Laurance WF (2002) Fire as a large-scale edge effect in Amazonian forests. *Journal of Tropical Ecology* 18: 311–325.
55. Goldammer JG, Price C (1998) Potential impacts of climate change on fire regimes in the tropics based on MAGICC and a GISS GCM-derived lightning model. *Climatic Change* 39: 273–296.
56. Laris P, Wardell D (2006) Good, bad or 'necessary evil'? Reinterpreting the colonial burning experiments in the savanna landscapes of West Africa. *The Geographical Journal* 172: 271–290.
57. Aragao L, Malhi Y, Roman-Cuesta RM, Saatchi S, Anderson LO, et al. (2007) Spatial patterns and fire response of recent Amazonian droughts. *Geophysical Research Letters* 34.
58. Clement RM, Horn SP (2001) Pre-Columbian land-use history in Costa Rica: a 3000-year record of forest clearance, agriculture and fires from Laguna Zoncho. *Holocene* 11: 419–426.
59. League BL, Horn SP (2000) A 10 000 year record of Paramo fires in Costa Rica. *Journal of Tropical Ecology* 16: 747–752.
60. Cochrane MA (2003) Fire science for rainforests. *Nature* 421: 913–919.
61. Marlon JR, Bartlein PJ, Carcaillet C, Gavin DG, Harrison SP, et al. (2008) Climate and human influences on global biomass burning over the past two millennia. *Nature Geosci* advanced online publication.
62. Whittaker RH (1975) Communities and ecosystems. New York: Macmillan.
63. Thornthwaite CW (1940) Atmospheric moisture in relation to ecological problems. *Ecology* 21: 17–28.
64. Stephenson NL (1990) Climatic Control of Vegetation Distribution - the Role of the Water-Balance. *American Naturalist* 135: 649–670.
65. van Wagner C (1987) Development and structure of the Canadian Forest Fire Weather Index System. Ottawa, Ontario, Canada.
66. Westerling AL, Hidalgo HG, Cayan DR, Swetnam TW (2006) Warming and earlier spring increase western US forest wildfire activity. *Science* 313: 940–943.
67. Hicke JA, Logan JA, Powell J, Ojima DS (2006) Changing temperatures influence suitability for modeled mountain pine beetle (*Dendroctonus ponderosae*) outbreaks in the western United States. *Journal of Geophysical Research-Biogeosciences* 111.
68. Holling CS (1973) Resilience and stability of ecological systems. *Annual Review of Ecology and Systematics* 4: 1–23.
69. Scheffer M, Carpenter S, Foley JA, Folke C, Walker B (2001) Catastrophic shifts in ecosystems. *Nature* 413: 591–596.
70. Brooks ML, Matchett JR (2006) Spatial and temporal patterns of wildfires in the Mojave Desert, 1980–2004. *Journal of Arid Environments* 67: 148–164.
71. D'Antonio CM, Vitousek PM (1992) Biological Invasions by Exotic Grasses, the Grass Fire Cycle, and Global Change. *Annual Review of Ecology and Systematics* 23: 63–87.
72. Loarie SR, Carter BE, Hayhoe K, McMahon S, Moe R, et al. (2008) Climate Change and the Future of California's Endemic Flora. *PLoS ONE* 3: e2502. doi:10.1371/journal.pone.0002502.
73. Bachelet D, Lenihan J, Neilson R, Drapek R, Kittel T (2005) Simulating the response of natural ecosystems and their fire regimes to climatic variability in Alaska. *Canadian Journal of Forest Research-Revue Canadienne De Recherche Forestiere* 35: 2244–2257.
74. Flannigan MD, Bergeron Y, Engelmark O, Wotton BM (1998) Future wildfire in circumboreal forests in relation to global warming. *Journal of Vegetation Science* 9: 469–476.
75. Shlisky A, Waugh J, Gonzalez P, Gonzalez M, Manta M, et al. (2007) Fire, ecosystems and people: Threats and strategies for global biodiversity conservation. Arlington: The Nature Conservancy.
76. Beaumont L, Hughes L, Pitman AJ (2008) Why is the choice of future climate scenarios for species distribution modelling important? *Ecology Letters* 11: 1135–1146.
77. Fischlin A, Midgley GF, Price J, Leemans R, Gopal B, et al. (2007) Ecosystems, their properties, goods, and services. In: Parry ML, Canziani OF, Palutikof JP, van der Linden PJ, Hanson CE, eds. *Climate Change 2007: Impacts, Adaptation and Vulnerability Contribution of Working Group II to the Fourth Assessment Report of the Intergovernmental Panel on Climate Change*. Cambridge: Cambridge University Press. pp 211–272.
